# Supplementary material
Source: publisher figshare collection journal article supplement (https://aacr.figshare.com/articles/dataset/_/23905217)
Supplement: Supplementary file 1 [file 41911400]

**Supplemental Table 3.** Recurrent regions of chromothripsis and chromoplexy together with the candidate genes located within the regions.

**A. Regions of chromothripsis.**

| <b>Region</b> | <b>Cytoband</b> | <b>Start</b> | <b>End</b>  | <b>Candidate genes</b> |
|---------------|-----------------|--------------|-------------|------------------------|
| <b>CT1</b>    | 1p36.11-1p34.3  | 25,339,109   | 35,908,555  | <i>SDC3, PUM1</i>      |
| <b>CT2</b>    | 1p33-1p32.3     | 49,221,975   | 52,554,304  | <i>FAF1, CDKN2C</i>    |
| <b>CT3</b>    | 1p13.3-1p12     | 110,700,197  | 119,813,638 | <i>TENT5C, NOTCH2</i>  |

**B. Regions of templated insertion.**

| <b>Region</b> | <b>Cytoband</b> | <b>Start</b> | <b>End</b>  | <b>Candidate genes</b>                            |
|---------------|-----------------|--------------|-------------|---------------------------------------------------|
| <b>TI1</b>    | 1p13.1-1p11.2   | 116,119,081  | 121,143,543 | <i>TENT5C, NOTCH2</i>                             |
| <b>TI2</b>    | 1q32.1-1p32.2   | 201,774,104  | 208,213,409 | <i>BTG2, FMOD, UBE2T, ELF3, MDM4, ELK4, KDM5B</i> |
